# Supplementary material
Source: PubMed Central journal article supplement (PMC6486741)
Supplement: pnas.1820749116.sapp.pdf [file pnas.1820749116.sapp.pdf]

Supplementary Information for

**Underwater ritual offerings in the Island of the Sun and the formation of the Tiwanaku State**

Christophe Delaere, José M. Capriles & Charles Stanish

Christophe Delaere

Email: [delaerechristophe@gmail.com](mailto:delaerechristophe@gmail.com)

**This PDF file includes:**

Figs. S1 to S4

Tables S1 to S1

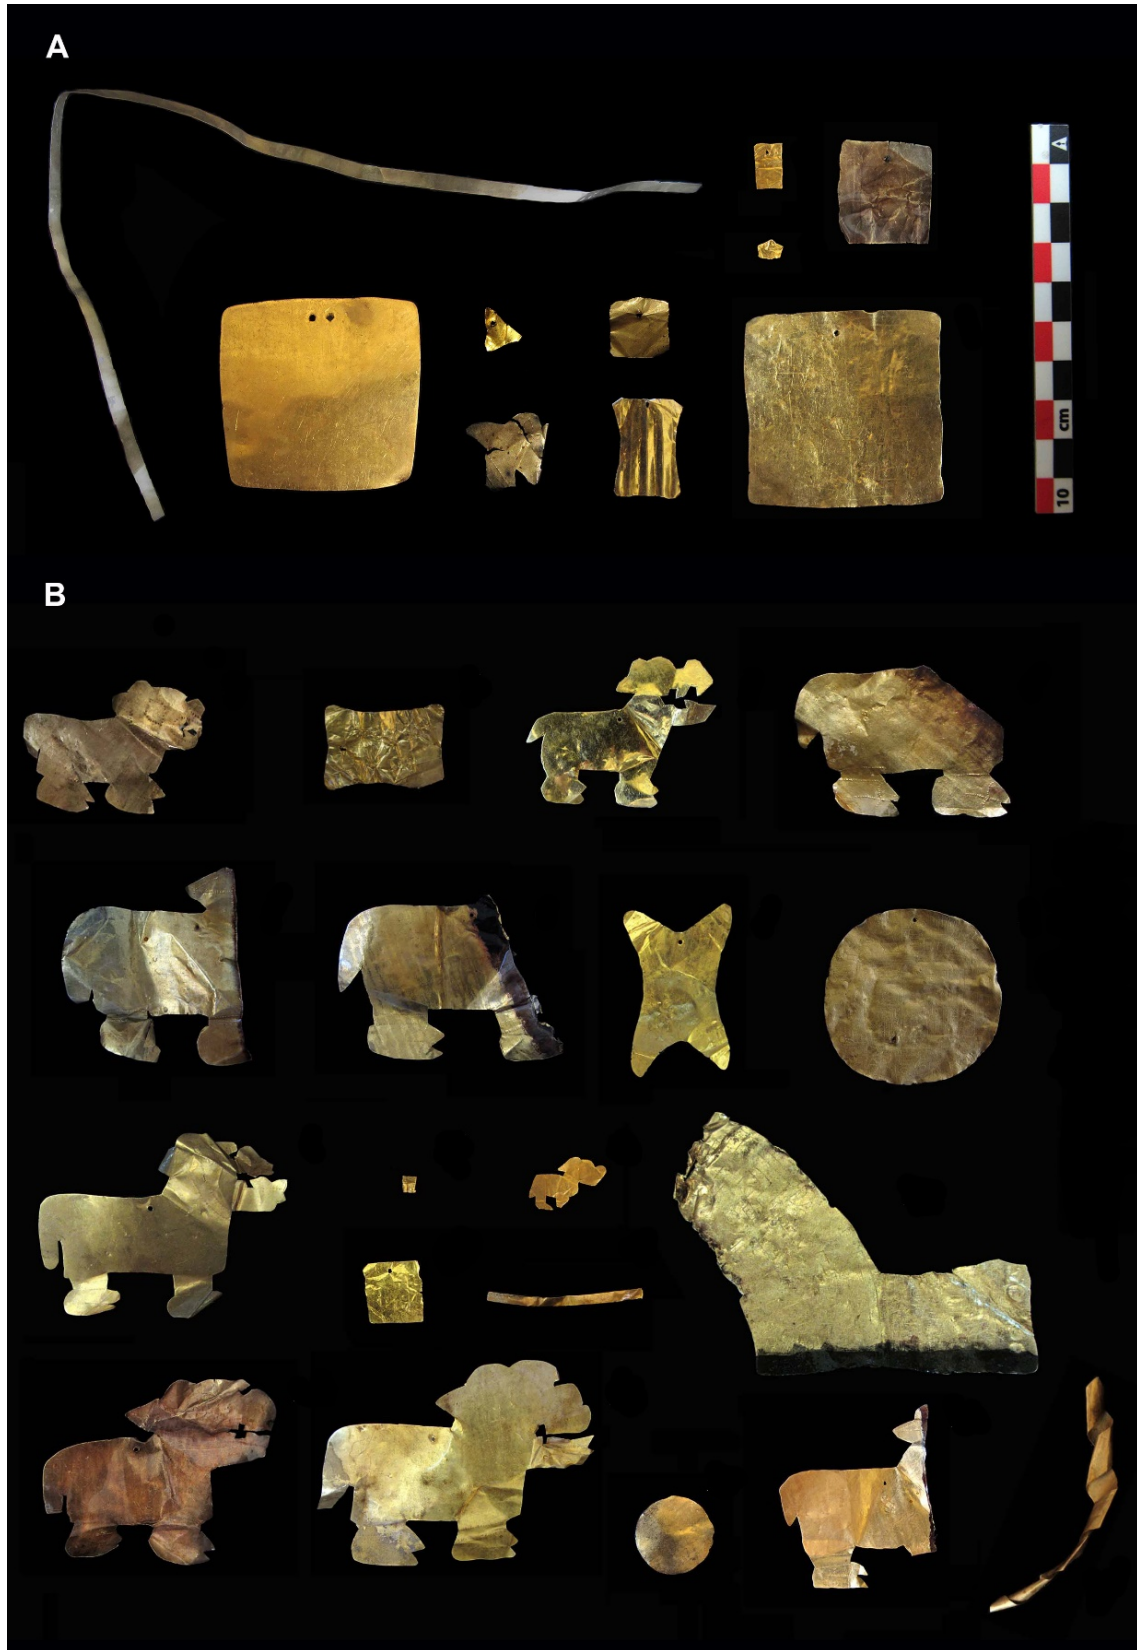

Fig. S1. Gold artifacts recovered from Tiwanaku contexts in A) Unit #1 and B) Unit #3 at Khoa. Photo Credit: Christophe Delaere, ULB.

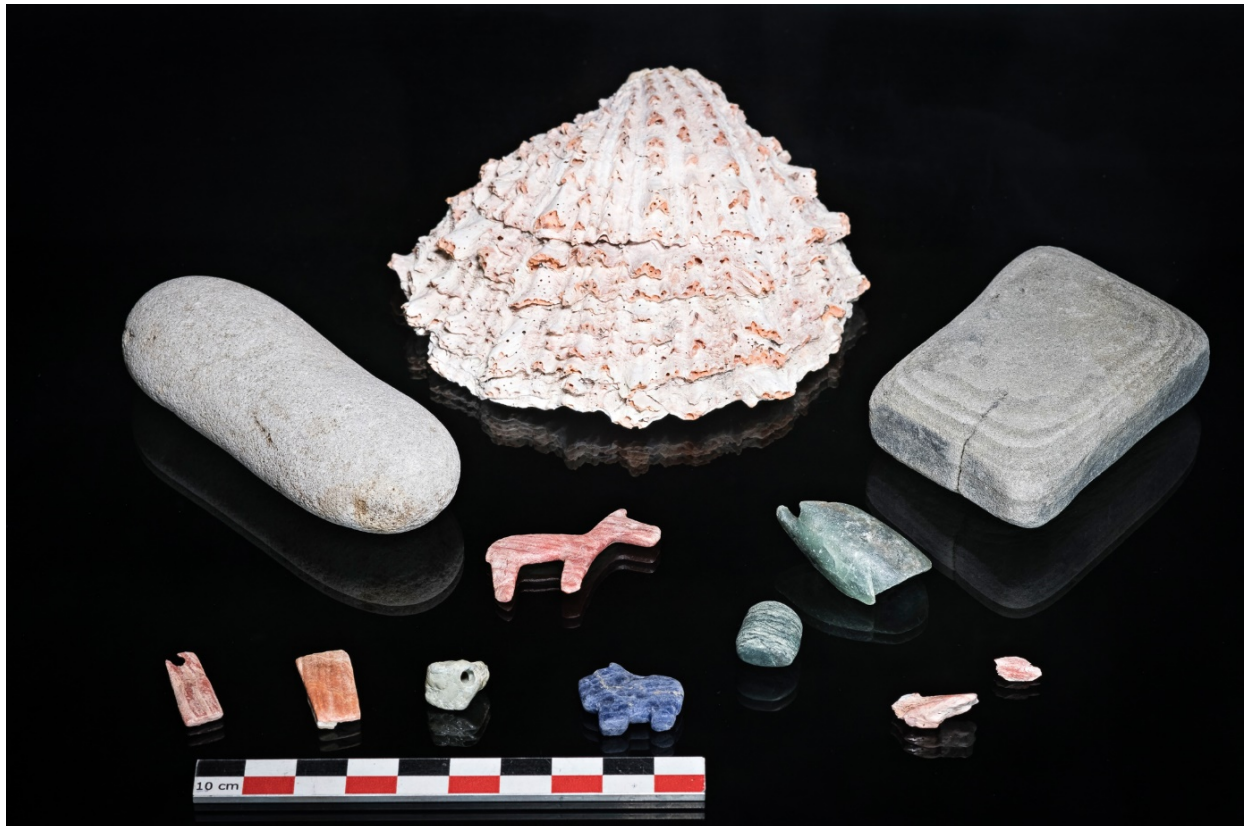

**Fig. S2.** Thorny oyster (*Spondylus* spp.) shell and lapidary items found in Khoa in association with Tiwanaku contexts. Image courtesy of Teddy Seguin (photographer).

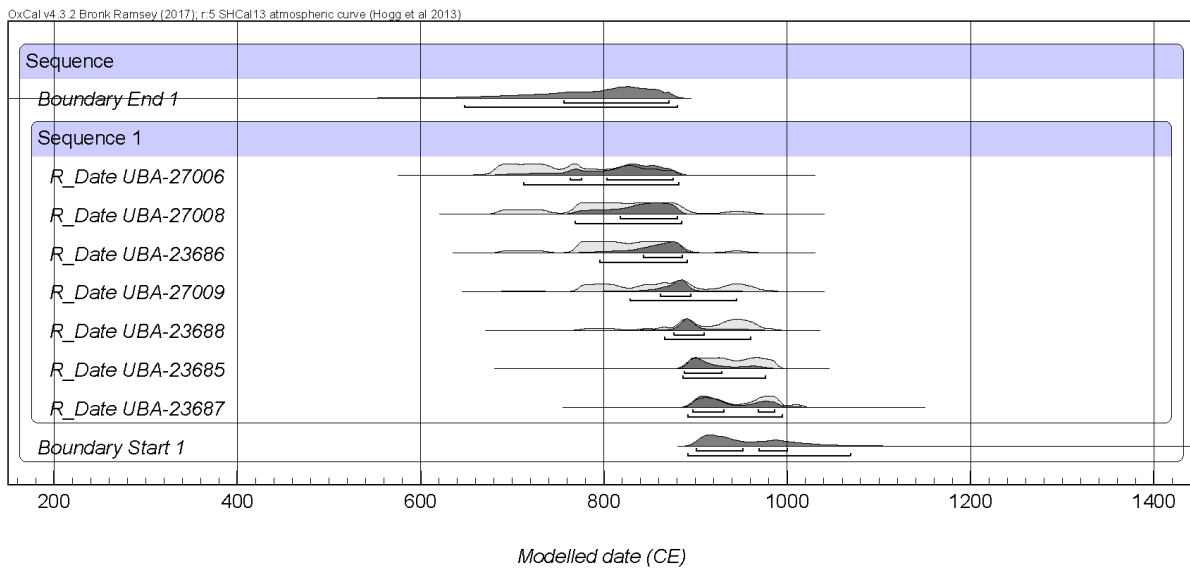

**Fig. S3.** Modelled radiocarbon dates from Khoa.

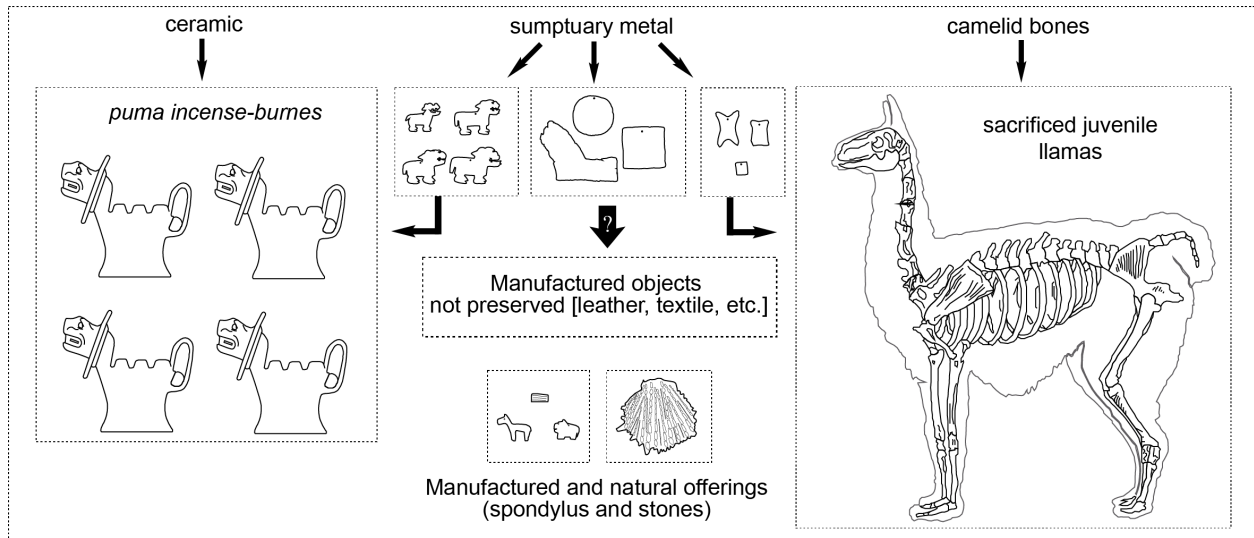

**Fig. S4. Reconstructed typical Tiwanaku-Period offering in the Khoa reef.**

**Table S1. Taxonomic representation of faunal remains from the excavations at Khoa.**

| Class and Taxa             | Unit 1     |                | Unit 2   |              | Unit 3     |               | Total      |                |
|----------------------------|------------|----------------|----------|--------------|------------|---------------|------------|----------------|
|                            | NISP       | Weight         | NISP     | Weight       | NISP       | Weight        | NISP       | Weight         |
| <b>Mammalia</b>            |            |                |          |              |            |               |            |                |
| Camelidae                  | 268        | 1833           | 1        | 38.13        | 115        | 1061.91       | 384        | 2933.04        |
| Felidae                    |            |                |          |              | 1          | 0.88          | 1          | 0.88           |
| Macrofauna                 | 14         | 3.77           |          |              | 1          | 1.53          | 15         | 5.3            |
| <b>Aves</b>                |            |                |          |              |            |               |            |                |
| <i>Phalacrocorax spp.</i>  | 1          | 2.5            |          |              | 6          | 12.06         | 7          | 14.56          |
| Anatidae                   | 2          | 0.25           |          |              |            |               | 2          | 0.25           |
| Aves                       | 11         | 0.68           |          |              | 19         | 0.33          | 30         | 1.01           |
| <b>Amphibia</b>            |            |                |          |              |            |               |            |                |
| <i>Telmatobius culeus</i>  | 42         | 22.45          | 6        | 2.2          | 68         | 30.38         | 116        | 55.03          |
| Anura                      | 51         | 9.44           |          |              | 27         | 7.55          | 78         | 16.99          |
| <b>Microfauna</b>          |            |                |          |              |            |               |            |                |
| Microfauna                 | 4          | 0.06           | 1        | 1.19         |            |               | 5          | 1.25           |
| <b>Osteichthyes</b>        |            |                |          |              |            |               |            |                |
| <i>Orestias spp.</i>       | 256        | 9.28           |          |              | 44         | 2.06          | 300        | 11.34          |
| <i>Trichomycterus spp.</i> | 13         | 4.83           |          |              | 18         | 4.42          | 31         | 9.25           |
| Osteichthyes               | 14         | 0.05           |          |              | 4          | 0.07          | 18         | 0.12           |
| <b>Bivalba</b>             |            |                |          |              |            |               |            |                |
| <i>Spondylus spp.</i>      | 1          | 1              |          |              | 5          | 169.61        | 6          | 170.61         |
| <b>Gran Total</b>          | <b>677</b> | <b>1887.31</b> | <b>8</b> | <b>41.52</b> | <b>308</b> | <b>1290.8</b> | <b>993</b> | <b>3219.63</b> |

Note: All weights in grams.
